# Supplementary material for: Genome-wide characterization of the soybean DOMAIN OF UNKNOWN FUNCTION 679 membrane protein gene family highlights their potential involvement in growth and stress response
Source: Frontiers journal article supplement (doi:10.3389/fpls.2023.1216082), 2023-09-08
Supplement: Data_Sheet_2.zip [file Data_Sheet_2.zip]

## Sheet: Table S1
Table S1. List of DMP gene family members in different crops.
Crop	Botanical name	DMP members	Location	Gene Start (bp)	Gene End (bp)	Strand	Gene ID used in Phylogenetic tree
Arabidopsis	Arabidopsis thaliana	At3G21520	Chr4	12600893	12601675	forward	AtDMP1
		At3G21550	Chr4	10181334	10182140	reverse	AtDMP2
		At4G24310	Chr4	14075235	14076011	reverse	AtDMP3
		At4g18425	Chr1	2951665	2952396	reverse	AtDMP4
		At3g02430	Chr3	499345	500174	forward	AtDMP5
		At5g46090	Chr3	7581959	7582793	forward	AtDMP6
		At4g28485	Chr3	7591483	7592322	reverse	AtDMP7
		At1g09157	Chr5	15875199	15876116	forward	AtDMP8
		At5g39650	Chr5	18693485	18694129	forward	AtDMP9
		At5g27370	Chr5	9667311	9667886	forward	AtDMP10
Soybean	Glycine max	Glyma.17G020800	Chr17	1537550	1538358	reverse	Glyma.17G020800
		Glyma.17G020900	Chr17	1542149	1542778	reverse	Glyma.17G020900
		Glyma.09G237500	Chr09	45930346	45931221	forward	Glyma.09G237500
		Glyma.07G253600	Chr07	43070783	43071879	forward	Glyma.07G253600
		Glyma.07G253500	Chr07	43065254	43066526	forward	Glyma.07G253500
		Glyma.07G201500	Chr07	37004908	37006282	reverse	Glyma.07G201500
		Glyma.13G235100	Chr13	34583343	34584299	forward	Glyma.13G235100
		Glyma.13G212400	Chr13	32599016	32599912	reverse	Glyma.13G212400
		Glyma.13G175000	Chr13	28964956	28965813	forward	Glyma.13G175000
		Glyma.02G075800	Chr02	6632578	6634036	reverse	Glyma.02G075800
		Glyma.06G288800	Chr06	47745348	47745971	forward	Glyma.06G288800
		Glyma.18G098300	Chr18	10205199	10205843	forward	Glyma.18G098300
		Glyma.18G097400	Chr18	10065330	10065974	forward	Glyma.18G097400
		Glyma.16G157800	Chr16	31832373	31834430	reverse	Glyma.16G157800
Peanut	Arachis hypogea	arahy.Tifrunner.gnm1.ann1.XZZ4TR.1	arahy.Arahy.04	3600343	3600910	forward	arahy.XZZ4TR.1
		arahy.Tifrunner.gnm2.ann1.JP0MMK.1	arahy.Arahy.20	4188378	4189002	forward	arahy.JP0MMK.1
		arahy.Tifrunner.gnm2.ann1.DMY225.1	arahy.Arahy.20	4186292	4186913	forward	arahy.DMY225.1
		arahy.Tifrunner.gnm2.ann1.22A3IK.1	arahy.Arahy.04	3057591	3058248	forward	arahy.22A3IK.1
		arahy.Tifrunner.gnm2.ann1.ZACS4K.1	arahy.Arahy.04	123376396	123377068	reverse	arahy.ZACS4K.1
		arahy.Tifrunner.gnm2.ann1.TQNH9K.1	arahy.Arahy.19	148723274	148723922	reverse	arahy.TQNH9K.1
		arahy.Tifrunner.gnm2.ann1.D6VJF6.1	arahy.Arahy.14	4391472	4392135	forward	arahy.D6VJF6.1
		arahy.Tifrunner.gnm2.ann1.L9XDRR.1	arahy.Arahy.11	140446334	140453912	reverse	arahy.L9XDRR.1
		arahy.Tifrunner.gnm2.ann1.Y9NGKZ.1	arahy.Arahy.10	2102197	2102818	forward	arahy.Y9NGKZ.1
		arahy.Tifrunner.gnm2.ann1.TFGI3I.1	arahy.Arahy.10	2103468	2104092	forward	arahy.TFGI3I.1
		arahy.Tifrunner.gnm2.ann1.JPH3P1.1	arahy.Arahy.04	123371936	123372806	reverse	arahy.JPH3P1.1
		arahy.Tifrunner.gnm2.ann1.EFHT67.1	arahy.Arahy.09	38496281	38496935	reverse	arahy.EFHT67.1
		arahy.Tifrunner.gnm2.ann1.EQQ960.1	arahy.Arahy.19	48567982	48570040	reverse	arahy.EQQ960.1
		arahy.Tifrunner.gnm2.ann1.BA29MC.1	arahy.Arahy.14	4932616	4933183	forward	arahy.BA29MC.1
Sunflower	Helianthus annuus	HanXRQChr16g0509181	HanXRQChr16	61473584	61474258	forward	HanXRQChr16g0509181
		HanXRQChr16g0509201	HanXRQChr16	61759757	61760371	forward	HanXRQChr16g0509201
		HanXRQChr12g0362201	HanXRQChr12	24662446	24663096	reverse	HanXRQChr12g0362201
		HanXRQChr01g0027211	HanXRQChr01	142969284	142969931	forward	HanXRQChr01g0027211
		HanXRQChr17g0545261	HanXRQChr17	41312033	41312701	reverse	HanXRQChr17g0545261
		HanXRQChr17g0557201	HanXRQChr17	116011082	116011687	forward	HanXRQChr17g0557201
		HanXRQChr17g0570101	HanXRQChr17	211554750	211555433	reverse	HanXRQChr17g0570101
		HanXRQChr06g0176451	HanXRQChr06	38870128	38870766	forward	HanXRQChr06g0176451
		HanXRQChr03g0087751	HanXRQChr03	151231387	151232019	forward	HanXRQChr03g0087751
Linseed	Linum usitatissimum	Lus10033645	scaffold701	958433	959089	reverse	Lus10033645
		Lus10012734	scaffold206	324965	325645	reverse	Lus10012734
		Lus10017689	scaffold765	517990	518643	reverse	Lus10017689
		Lus10021955	scaffold164	738316	738912	reverse	Lus10021955
		Lus10015395	scaffold635	329992	330609	forward	Lus10015395
		Lus10015394	scaffold635	328576	329271	forward	Lus10015394
		Lus10015396	scaffold635	331590	332288	forward	Lus10015396
		Lus10039871	scaffold15	2007279	2007605	reverse	Lus10039871
		Lus10013970	scaffold820	310245	310862	forward	Lus10013970
		Lus10013969	scaffold820	308748	309449	forward	Lus10013969
		Lus10013933	scaffold820	136979	137215	forward	Lus10013933
		Lus10013975	scaffold820	323089	324490	forward	Lus10013975
		Lus10013974	scaffold820	320192	321468	forward	Lus10013974
		Lus10013971	scaffold820	311899	312597	forward	Lus10013971
		Lus10041247	scaffold280	1593901	1594488	reverse	Lus10041247
		Lus10018635	scaffold1308	650838	651803	reverse	Lus10018635
Cotton	Gossypium hirsutum	Gohir.D04G141400	D04	49636718	49637581	forward	Gohir.D04G141400
		Gohir.D11G073600	D11	6321720	6322602	forward	Gohir.D11G073600
		Gohir.A11G069600	A11	6412431	6413311	forward	Gohir.A11G069600
		Gohir.A02G061500	A02	10524481	10525285	reverse	Gohir.A02G061500
		Gohir.D02G067100	D02	9924348	9925213	reverse	Gohir.D02G067100
		Gohir.A10G105400	A10	22736855	22737586	forward	Gohir.A10G105400
		Gohir.A10G028100	A10	2534888	2535745	reverse	Gohir.A10G028100
		Gohir.A10G105300	A10	22712409	22713277	forward	Gohir.A10G105300
		Gohir.D10G163400	D10	47503642	47504493	reverse	Gohir.D10G163400
		Gohir.D10G163300	D10	47468172	47468927	reverse	Gohir.D10G163300
		Gohir.D10G028500	D10	2474344	2474973	reverse	Gohir.D10G028500
		Gohir.A04G102500	A04	75407056	75407912	forward	Gohir.A04G102500
		Gohir.D09G233400	D09	52159291	52160126	reverse	Gohir.D09G233400
		Gohir.A06G133400	A06	95186596	95187591	reverse	Gohir.A06G133400
		Gohir.D08G229700	D08	65347387	65348166	reverse	Gohir.D08G229700
		Gohir.D01G174500	D01	57791894	57792871	reverse	Gohir.D01G174500
		Gohir.A01G183500	A01	95938582	95939571	reverse	Gohir.A01G183500
		Gohir.A09G232300	A09	80328298	80328891	reverse	Gohir.A09G232300
		Gohir.A08G212700	A08	119507333	119508110	reverse	Gohir.A08G212700
Sesame	Sesamum indicum	XP_011090899.1	LG10	1131023	1133275	forward	SiDMP1
		SIN_1025896	LG10	13037065	13037745	forward	SiDMP2
		SIN_1022895	LG08	17302994	17303620	forward	SiDMP3
		XP_011096362.1	LG12	4484614	4485906	reverse	SiDMP4
		SIN_1022896	LG08	17304757	17,305,389	forward	SiDMP5
		SIN_1016808	LG16	415938	416609	reverse	SiDMP6
		SIN_1018776	LG4	3941003	3941668	forward	SiDMP7
Rapeseed	Brassica napus	BnaAnng32400D	LK040983	633	1358	reverse	BnaAnng32400D
		BnaC01g40900D	LK033926	26028	26,702	forward	BnaC01g40900D
		BnaA03g55920D	LK033498	39409	40137	reverse	BnaA03g55920D
		BnaC03g76810D	LK033428	43210	43,854	reverse	BnaC03g76810D
		BnaC05g30650D	LK032586	138056	138796	reverse	BnaC05g30650D
		BnaA05g19650D	LK032428	67027	67641	forward	BnaA05g19650D
		BnaA05g19640D	LK032428	73310	73867	reverse	BnaA05g19640D
		BnaC01g09960D	LK032423	125848	126138	forward	BnaC01g09960D
		BnaA01g25000D	LK032397	45390	45947	forward	BnaA01g25000D
		BnaA01g25010D	LK032397	47633	48241	reverse	BnaA01g25010D
		BnaA01g32990D	LK032340	252118	252422	forward	BnaA01g32990D
		BnaA01g32970D	LK032340	259017	259682	forward	BnaA01g32970D
		BnaA01g13810D	LK032332	112009	112671	forward	BnaA01g13810D
		BnaC03g56710D	LK032337	196359	197012	reverse	BnaC03g56710D
		BnaA06g36210D	LK032315	1013	1666	forward	BnaA06g36210D
		BnaA03g49300D	LK032245	487457	487768	reverse	BnaA03g49300D
		BnaA08g14730D	492186	492845	492845	forward	BnaA08g14730D
		BnaC01g32060D	LK032094	98496	98614	reverse	BnaC01g32060D
		BnaC01g31930D	LK032094	217789	218397	forward	BnaC01g31930D
		BnaC01g31920D	LK032094	225302	225859	reverse	BnaC01g31920D
		BnaC08g11630D	LK031990	572163	572828	forward	BnaC08g11630D
		Bnaa01g08420D	LK032348	19104	19415	reverse	Bnaa01g08420D
		Bnaa08g08760D	JAGKQM010000008	8413403	8413687	forward	Bnaa08g08760D
		Bnac07g41350D	LK031873	1289656	1290457	forward	Bnac07g41350D
		BnaC07g18840D	LK031812	235754	236407	forward	BnaC07g18840D
		BnaA01g09210D	LK031816	443428	444102	reverse	BnaA01g09210D
		BnaC01g16250D	LK031943	568415	569065	reverse	BnaC01g16250D
		BnaA04g09480D	LK031801	333403	334,137	reverse	BnaA04g09480D
		BnaC03g03890D	LK031823	1883345	1885410	forward	BnaC03g03890D
		BnaC07g18830D	LK031812	229920	230918	forward	BnaC07g18830D
Barrel medic	Medicago truncatula	Medtr2g014520	chr2	4167726	4168349	reverse	Medtr2g014520
		Medtr2g020850	chr2	7008821	7009816	forward	Medtr2g020850
		Medtr2g014550	chr2	4178399	4179413	reverse	Medtr2g014550
		Medtr7g010890	chr7	2787257	2787913	reverse	Medtr7g010890
		Medtr5g044580	chr5	19577681	19578337	forward	Medtr5g044580
		Medtr4g118480	chr4	49075128	49076155	forward	Medtr4g118480
		Medtr4g118470	chr4	49067880	49068993	reverse	Medtr4g118470
		Medtr4g088335	chr4	34944124	34944744	forward	Medtr4g088335
		Medtr4g078870	chr4	30502002	30502619	reverse	Medtr4g078870
Tomato	Solanum lycopersicum	Solyc01g103580.2	SL2.50ch01	92152884	92153909	forward	Solyc01g103580.2
		Solyc01g080490.2	SL2.50ch01	79721811	79722647	reverse	Solyc01g080490.2
		Solyc05g007920.2	SL2.50ch05	2350007	2351451	forward	Solyc05g007920.2
		Solyc12g005490.1	SL2.50ch12	292388	293065	reverse	Solyc12g005490.1
		Solyc10g050200.1	SL2.50ch10	48118856	48119491	forward	Solyc10g050200.1
		Solyc10g008970.1	SL2.50ch10	2997582	2998241	forward	Solyc10g008970.1
		Solyc02g077640.1	SL2.50ch02	42537780	42538409	forward	Solyc02g077640.1
Foxtail millet	Setaria italica	Seita.5G404300	scaffold_5	43099337	43100002	forward	Seita.5G404300
		Seita.5G176500	scaffold_5	19570306	19570968	reverse	Seita.5G176500
		Seita.5G220800	scaffold_5	28058844	28059939	forward	Seita.5G220800
		Seita.5G176800	scaffold_5	19697166	19698294	forward	Seita.5G176800
		Seita.5G265600	scaffold_5	32766190	32766813	forward	Seita.5G265600
		Seita.9G391600	scaffold_9	45467943	45468536	reverse	Seita.9G391600
		Seita.1G160600	scaffold_1	22642053	22643099	forward	Seita.1G160600
		Seita.6G005100	scaffold_6	366478	367748	forward	Seita.6G005100
		Seita.4G155100	scaffold_4	21858334	21859635	forward	Seita.4G155100
		Seita.4G133200	scaffold_4	14319451	14320408	forward	Seita.4G133200
		Seita.4G099400	scaffold_4	8685627	8686538	reverse	Seita.4G099400
		Seita.4G128900	scaffold_4	13501828	13502862	forward	Seita.4G128900
		Seita.3G147300	scaffold_3	10610886	10613172	forward	Seita.3G147300
		Seita.2G412200	scaffold_2	47021409	47022327	forward	Seita.2G412200
Rice	Oryza sativa	ChrUn.fgenesh.gene.90	ChrUn	588985	590022	forward	Os ChrUn.fgenesh.gene.90
		ChrUn.fgenesh.gene.92	ChrUn	599609	600256	forward	Os ChrUn.fgenesh.gene.92
		LOC_Os08g01530	Chr8	321888	323000	reverse	LOC_Os08g01530
		LOC_Os07g45080	Chr7	26911517	26912446	forward	LOC_Os07g45080
		LOC_Os07g22510	Chr7	12665274	12666368	forward	LOC_Os07g22510
		LOC_Os01g29280	Chr1	16415041	16416138	forward	LOC_Os01g29280
		LOC_Os01g29330	Chr1	16435856	16436845	forward	LOC_Os01g29330
		LOC_Os01g29240	Chr1	16392304	16393382	reverse	LOC_Os01g29240
		LOC_Os01g28080	Chr1	15714116	15714559	reverse	LOC_Os01g28080
		LOC_Os01g28089	Chr1	15739887	15741584	reverse	LOC_Os01g28089
		LOC_Os01g27070	Chr1	15099900	15100457	forward	LOC_Os01g27070
		LOC_Os01g65992	Chr1	38305824	38306734	forward	LOC_Os01g65992
		LOC_Os01g27100	Chr1	15111532	15112071	forward	LOC_Os01g27100
		LOC_Os01g27120	Chr1	15118693	15119756	forward	LOC_Os01g27120
		LOC_Os03g25440	Chr3	14543750	14544785	forward	LOC_Os03g25440
		LOC_Os02g27800	Chr2	16455128	16455778	reverse	LOC_Os02g27800
		LOC_Os06g24490	Chr6	14347071	14348330	reverse	LOC_Os06g24490
		LOC_Os12g22270	Chr12	12556297	12556746	reverse	LOC_Os12g22270
		LOC_Os05g48840	Chr5	27989730	27990665	reverse	LOC_Os05g48840
Maize	Zea mays	Zm00001d007047	2	220835395	220835967	forward	Zm00001d007047
		Zm00001d037387	6	124090279	124091124	forward	Zm00001d037387
		Zm00001d034995	6	1301118	1301916	forward	Zm00001d034995
		Zm00001d044435	3	228026403	228027161	forward	Zm00001d044435
		Zm00001d047420	9	129497163	129497949	reverse	Zm00001d047420
		Zm00001d044777	9	2199682	2200449	forward	Zm00001d044777
		Zm00001d046149	9	67283987	67284751	forward	Zm00001d046149
		Zm00001d045826	9	42168801	42169346	reverse	Zm00001d045826
		Zm00001d044822	9	3919235	3919852	forward	Zm00001d044822
		Zm00001d011558	8	154453455	154454081	forward	Zm00001d011558
		Zm00001d012217	8	170342986	170343896	reverse	Zm00001d012217
		Zm00001d009557	8	70051211	70051921	forward	Zm00001d009557
		Zm00001d008235	8	2109803	2110486	forward	Zm00001d008235
		Zm00001d016492	5	164598332	164598967	forward	Zm00001d016492
Sorghum	Sorghum bicolor	SbiBTX642.09G250800	chromosome_9	55138643	55139611	reverse	SbiBTX642.09G250800
		SbiBTX642.10G101700	chromosome_10	8852285	8853575	reverse	SbiBTX642.10G101700
		SbiBTX642.10G128900	chromosome_10	14291943	14293063	forward	SbiBTX642.10G128900
		SbiBTX642.10G170700	chromosome_10	44401897	44402925	forward	SbiBTX642.10G170700
		SbiBTX642.10G133700	chromosome_10	15807290	15809524	forward	SbiBTX642.10G133700
		SbiBTX642.10G101600	chromosome_10	8846180	8848152	reverse	SbiBTX642.10G101600
		SbiBTX642.10G133800	chromosome_10	15815552	15816761	forward	SbiBTX642.10G133800
		SbiBTX642.10G097200	chromosome_10	8284560	8285236	reverse	SbiBTX642.10G097200
		SbiBTX642.03G406300	chromosome_3	69571600	69572854	forward	SbiBTX642.03G406300
		SbiBTX642.03G270100	chromosome_3	59330606	59331228	forward	SbiBTX642.03G270100
		SbiBTX642.03G138300	chromosome_3	12423711	12424406	reverse	SbiBTX642.03G138300
		SbiBTX642.03G229100	chromosome_3	55171092	55172417	forward	SbiBTX642.03G229100
		SbiBTX642.07G006200	chromosome_7	498645	499908	reverse	SbiBTX642.07G006200
		SbiBTX642.01G383100	chromosome_1	66168531	66169595	reverse	SbiBTX642.01G383100
		SbiBTX642.02G411500	chromosome_2	75977526	75978400	forward	SbiBTX642.02G411500
		SbiBTX642.04G160200	chromosome_4	39795879	39796813	forward	SbiBTX642.04G160200

## Sheet: Table S2
Table S2. Details of the transcriptome datasets used in this study
Sr.No.	Tissue type	Replication	Treatment	Stage	NCBI accession ID (SRA)	Bioproject ID	Submitted by	Publications#
1	Root	Replication 1	Root tissue	not available	SRR5487705	PRJNA372498	DOE Joint Genome Institute, USA	not available
2	Root	Replication 2	Root tissue	not available	SRR5487715	PRJNA372499	DOE Joint Genome Institute, USA	not available
3	Root	Replication 3	Root tissue	not available	SRR5487727	PRJNA372500	DOE Joint Genome Institute, USA	not available
4	Root hair	Replication 1	lateral root tissue	not available	SRR5487702	PRJNA373195	DOE Joint Genome Institute, USA	not available
5	Root hair	Replication 2	lateral root tissue	not available	SRR5487720	PRJNA372493	DOE Joint Genome Institute, USA	not available
6	Root hair	Replication 3	lateral root tissue	not available	SRR5487710	PRJNA372494	DOE Joint Genome Institute, USA	not available
7	Nodules	Replication 1	nodules from symbiotic condition	not available	SRR1588543	PRJNA256762	DOE Joint Genome Institute, USA	not available
8	Nodules	Replication 2	nodules from symbiotic condition	not available	SRR1588530	PRJNA256762	DOE Joint Genome Institute, USA	not available
9	Nodules	Replication 3	nodules from symbiotic condition	not available	SRR1588547	PRJNA256762	DOE Joint Genome Institute, USA	not available
10	SAM	Replication 1	Shoot tip tissue	not available	SRR5487707	PRJNA372532	DOE Joint Genome Institute, USA	not available
11	SAM	Replication 2	Shoot tip tissue	not available	SRR5487701	PRJNA372533	DOE Joint Genome Institute, USA	not available
12	SAM	Replication 3	Shoot tip tissue	not available	SRR5487730	PRJNA372531	DOE Joint Genome Institute, USA	not available
13	Leaf	Replication 1	Leaf tissue	not available	SRR5487699	PRJNA372497	DOE Joint Genome Institute, USA	not available
14	Leaf	Replication 2	Leaf tissue	not available	SRR5487724	PRJNA372495	DOE Joint Genome Institute, USA	not available
15	Leaf	Replication 3	Leaf tissue	not available	SRR5487729	PRJNA372496	DOE Joint Genome Institute, USA	not available
16	Stem	Replication 1	Stem tissue	not available	SRR5487692	PRJNA372534	DOE Joint Genome Institute, USA	not available
17	Stem	Replication 2	Stem tissue	not available	SRR5487712	PRJNA372408	DOE Joint Genome Institute, USA	not available
18	Stem	Replication 3	Stem tissue	not available	SRR5487728	PRJNA372409	DOE Joint Genome Institute, USA	not available
19	Flower	Replication 1	Open flower tissue	not available	SRR1588521	PRJNA256762	DOE Joint Genome Institute, USA	not available
20	Flower	Replication 2	Open flower tissue	not available	SRR1588524	PRJNA256762	DOE Joint Genome Institute, USA	not available
21	Flower	Replication 3	Open flower tissue	not available	SRR1588542	PRJNA256763	DOE Joint Genome Institute, USA	not available
22	Pod	Replication 1	Pod tissue	not available	SRR13043903	PRJNA677945	Nanjing Agricultural University, China	not available
23	Pod	Replication 2	Pod tissue	not available	SRR13077927	PRJNA677945	Nanjing Agricultural University, China	not available
24	Pod	Replication 3	Pod tissue	not available	SRR13078543	PRJNA677945	Nanjing Agricultural University, China	not available
25	Seed	Replication 1	Seed	S9 stage of development	SRR5487721	PRJNA373282	DOE Joint Genome Institute, USA	not available
26	Seed	Replication 2	Seed	S9 stage of development	SRR5487711	PRJNA372529	DOE Joint Genome Institute, USA	not available
27	Seed	Replication 3	Seed	S9 stage of development	SRR5487722	PRJNA372530	DOE Joint Genome Institute, USA	not available
28	Leaf	Replication 1	Comparison between two vegetative stage	20 days after germination	SRR8241878	PRJNA506905	Universidade Federal de Viçosa, Brazil	Melo et al., 2018
29	Leaf	Replication 2	Comparison between two vegetative stage	20 days after germination	SRR8241879	PRJNA506905	Universidade Federal de Viçosa, Brazil	Melo et al., 2018
30	Leaf	Replication 3	Comparison between two vegetative stage	20 days after germination	SRR8241880	PRJNA506905	Universidade Federal de Viçosa, Brazil	Melo et al., 2018
31	Leaf	Replication 1	Comparison between two vegetative stage	80 days after germination	SRR8241881	PRJNA506905	Universidade Federal de Viçosa, Brazil	Melo et al., 2018
32	Leaf	Replication 2	Comparison between two vegetative stage	80 days after germination	SRR8241882	PRJNA506905	Universidade Federal de Viçosa, Brazil	Melo et al., 2018
33	Leaf	Replication 3	Comparison between two vegetative stage	80 days after germination	SRR8241883	PRJNA506905	Universidade Federal de Viçosa, Brazil	Melo et al., 2018
34	Leaf	Replication 1	Control plant without any treatment	Flowering stage	SRR19849628	PRJNA852689	Shenyang Agricultural University, China	not available
35	Leaf	Replication 2	Control plant without any treatment	Flowering stage	SRR19849617	PRJNA852689	Shenyang Agricultural University, China	not available
36	Leaf	Replication 3	Control plant without any treatment	Flowering stage	SRR19849614	PRJNA852689	Shenyang Agricultural University, China	not available
37	Leaf	Replication 1	drought stress for 7 days	Flowering stage	SRR19849611	PRJNA852689	Shenyang Agricultural University, China	not available
38	Leaf	Replication 2	drought stress for 7 days	Flowering stage	SRR19849626	PRJNA852689	Shenyang Agricultural University, China	not available
39	Leaf	Replication 3	drought stress for 7 days	Flowering stage	SRR19849625	PRJNA852689	Shenyang Agricultural University, China	not available
40	Leaf	Replication 1	drought stress for 17 days	Flowering stage	SRR19849624	PRJNA852689	Shenyang Agricultural University, China	not available
41	Leaf	Replication 2	drought stress for 17 days	Flowering stage	SRR19849623	PRJNA852689	Shenyang Agricultural University, China	not available
42	Leaf	Replication 3	drought stress for 17 days	Flowering stage	SRR19849622	PRJNA852689	Shenyang Agricultural University, China	not available
43	Leaf	Replication 1	drought stress for 37 days	Flowering stage	SRR19849621	PRJNA852689	Shenyang Agricultural University, China	not available
44	Leaf	Replication 2	drought stress for 37 days	Flowering stage	SRR19849620	PRJNA852689	Shenyang Agricultural University, China	not available
45	Leaf	Replication 3	drought stress for 37 days	Flowering stage	SRR19849619	PRJNA852689	Shenyang Agricultural University, China	not available
46	Leaf	Replication 1	40 degree C heat stress	V3 stage of development after preculturing	SRR12164953	PRJNA644602	University of North Texas, USA	not available
47	Leaf	Replication 2	40 degree C heat stress	V3 stage of development after preculturing	SRR12164954	PRJNA644602	University of North Texas, USA	not available
48	Leaf	Replication 3	40 degree C heat stress	V3 stage of development after preculturing	SRR12164955	PRJNA644602	University of North Texas, USA	not available
49	Root	Replication 1	Salinity stress	not available	SRR21151088	PRJNA871800	Yangzhou University, China	not available
50	Root	Replication 2	Salinity stress	not available	SRR21151087	PRJNA871800	Yangzhou University, China	not available
51	Root	Replication 3	Salinity stress	not available	SRR21151086	PRJNA871800	Yangzhou University, China	not available
52	Root	Replication 1	72 hours post Inoculation of Fusarium oxysporum FO40	Seedling stage	SRR1914586	PRJNA278121	Iowa State University, USA	Lanubile et al., 2015
53	Root	Replication 2	72 hours post Inoculation of Fusarium oxysporum FO40	Seedling stage	SRR1914587	PRJNA278121	Iowa State University, USA	Lanubile et al., 2015
54	Root	Replication 3	72 hours post Inoculation of Fusarium oxysporum FO40	Seedling stage	SRR1914588	PRJNA278121	Iowa State University, USA	Lanubile et al., 2015
55	Root	Replication 1	96 hours post Inoculation of Fusarium oxysporum FO40	Seedling stage	SRR1914589	PRJNA278121	Iowa State University, USA	Lanubile et al., 2015
56	Root	Replication 2	97 hours post Inoculation of Fusarium oxysporum FO40	Seedling stage	SRR1914590	PRJNA278121	Iowa State University, USA	Lanubile et al., 2015
57	Root	Replication 3	98 hours post Inoculation of Fusarium oxysporum FO40	Seedling stage	SRR1914591	PRJNA278121	Iowa State University, USA	Lanubile et al., 2015
58	Root	No replication	48 hours post infection of macrophomina phasiolina	14 days old seedling of resistance genotype	SRR6675512	PRJNA433069	Jawaharlal Nehru Agriculture University, India	not available
59	Root	No replication	49 hours post infection of macrophomina phasiolina	14 days old seedling of susceptible genotype	SRR6675514	PRJNA433069	Jawaharlal Nehru Agriculture University, India	not available
60	Root	Replication 1	30 days post aphid/soybean cyst nematodes infestation	V2 stage of development	SRR8427388	PRJNA514200	South Dakota State University, USA	not available
61	Root	Replication 2	30 days post aphid/soybean cyst nematodes infestation	V2 stage of development	SRR8427389	PRJNA514200	South Dakota State University, USA	not available
62	Root	Replication 3	30 days post aphid/soybean cyst nematodes infestation	V2 stage of development	SRR8427390	PRJNA514200	South Dakota State University, USA	not available
63	Root	Replication 1	30 days post aphids infestation	V2 stage of development	SRR8427385	PRJNA514200	South Dakota State University, USA	not available
64	Root	Replication 2	30 days post aphids infestation	V2 stage of development	SRR8427386	PRJNA514200	South Dakota State University, USA	not available
65	Root	Replication 3	30 days post aphids infestation	V2 stage of development	SRR8427387	PRJNA514200	South Dakota State University, USA	not available
66	Root	Replication 1	30 days post soybean cyst nematodes infestation	V2 stage of development	SRR8427371	PRJNA514200	South Dakota State University, USA	not available
67	Root	Replication 2	30 days post soybean cyst nematodes infestation	V2 stage of development	SRR8427383	PRJNA514200	South Dakota State University, USA	not available
68	Root	Replication 3	30 days post soybean cyst nematodes infestation	V2 stage of development	SRR8427384	PRJNA514200	South Dakota State University, USA	not available
					# References
					Melo, B. P., Fraga, O. T., Silva, J. C. F., Ferreira, D. O., Brustolini, O. J., Carpinetti, P. A., et al. (2018). Revisiting the soybean GmNAC superfamily.Front Plant Sci, 2018;9:1864
					Lanubile, A., Muppirala, U. K., Severin, A. J., Marocco, A., and Munkvold, G. P. (2015). Transcriptome profiling of soybean (Glycine max) roots challenged with pathogenic and non-pathogenic isolates of Fusarium oxysporum. BMC genomics, 16, 1-14.

## Sheet: Table S3
Table S3. List of primers used in the qPCR and in vitro cleavage efficiency analysis.
No.	Target gene	Primer name	Sequence (5' to 3')	Purpose
1	Glyma.06G288800	Glyma.06G288800_qRT-F	TTGGAAAACGCCCCTACAC	qPCR
2		Glyma.06G288800_qRT-R	GGCCTTGGTGTGTGAAAAGT
3	Glyma.07G253500	Glyma.07G253500_qRT-F	TGATTGCAGACAGCTCATCC
4		Glyma.07G253500_qRT-R	TTCACGAATTGGAACACGAA
5	Glyma.07G253600	Glyma.07G253600_qRT-F	TTTGCGGTGTTAGGGCTATT
6		Glyma.07G253600_qRT-R	TTCTGGGGAGGTGGTGTTAG
7	Glyma.09G237500	Glyma.09G237500_qRT-F	TGACAGTTTCCATGGCAC
8		Glyma.09G237500_qRT-R	AAGGCAATTGGTGACCCTA
9	Glyma.13G212400	Glyma.13G212400_qRT-F	TAGCCTCCAAAACAGCCACT
10		Glyma.13G212400_qRT-R	CAAGGAAAGAGCCAGTGAGG
11	Glyma.13G235100	Glyma.13G235100_qRT-F	GAAGAAAGGCTACCACTCCTGA
12		Glyma.13G235100_qRT-R	ATTTGTGAAGATCGGGGACA
13	Glyma.17G020800	Glyma.17G020800_qRT-F	CTAACACCACCTCCCCAAAA
14		Glyma.17G020800_qRT-R	CCATGCTGATGCAGGTACATA
15	Glyma.18G097400	Glyma.18G097400_qRT-F	TGAACCCCTCTTCCAACCCTCCA
16		Glyma.18G097400_qRT-R	ATCGGGGCCGTGGAAGCTGTCA
17	Glyma.18G098300	Glyma.18G098300_qRT-F	GAACAACAAATCGGCATCAA
18		Glyma.18G098300_qRT-R	GGGAGGAAGTTACCGAGGAG
19	Glyma.18g290800 (GmActin11)	GmActin11-F	ATCTTGACTGAGCGTGGTTATTCC
20		GmActin11-R	GCTGGTCCTGGCTGTCTCC
21	GmDMP 8&9	GmDMP8/9InCL-F	CCGTCAATAACCACCTAACTTTC	Amplification of GmDMP8&9 for in vitro cleavage analysis
22		GmDMP8/9inCL-R	GCACAATTATCCGACCAATAATCC
23	SgDMP#1_IVT	SgDMP#1_IVT-F	TAATACGACTCACTATAGGACCATCTCAAAAGTGAGG	SgRNA synthesis
24		SgDMP#1_IVT-R	TTCTAGCTCTAAAACCCTCACTTTTGAGATGGTCC
25	SgDMP#2_IVT	SgDMP#2_IVT-F	TAATACGACTCACTATAGCTCCATATCCTTATCCTTCC
26		SgDMP#2_IVT-R	TTCTAGCTCTAAAACGGAAGGATAAGGATATGGAG

## Sheet: Table S4
Table S4. The MEME-predicted motif sequences and lengths in soybean DMP proteins.
Motif ID	Conserved amino acid sequences	width	N sites	E-value	Pfam description
Motif1	SKYKLRFIDFVHAVMSLLVFAAVALLDQN	29	23	1.1e-267	Protein of unknown function (DUF679)
Motif2	IQKAISKTLSSTANLANLLPTGTVLAFQLLSPVLTNNGECB	41	21	2.5e-298	Protein of unknown function (DUF679)
Motif3	LVNKLLTSILLVLCAFSCFFSSFTDSFKGSD	31	22	8.6e-236	Protein of unknown function (DUF679)
Motif4	LQVLPVVVGVFCSMLFVVFPTKRHGIGYP	29	22	9.5e-251	Protein of unknown function (DUF679)
Motif5	GKVYYGFATFKGLWVFDGSTT	21	22	3.8e-154	Protein of unknown function (DUF679) and Protein of unknown function (DUF1317)
Motif6	VVNCFYPGPEKETKZ	15	18	4.5e-71	no match
Motif7	MDLNEQQIGIKVYNNNATPAPEHETLNPSSNPPQPKKHRA	40	3	6.2e-49	no match
Motif8	YNNSKNHDEQKLPLDDQQQQQNDDDYRDL	29	4	3.4e-20	no match
Motif9	SDSNDTSPKSN	11	5	0.0008	no match
Motif10	MEKTEESVGIRVYTATPPQKPSP	23	2	0.0027	no match

## Sheet: Table S5
Table S5. Predicted cis-acting regulatory elements (CAREs) in the promoters of soybean DMP genes. Colours indicate the grouping of CAREs in different categories based on their functional relevance viz., growth and development-responsive elements, light responsive elements, phyhormonal responsive elements, and stress-responsive elements.
Type	Regulatory element	Motif	Number of binding sites														Function
			Glyma.17G020800	Glyma.17G020900	Glyma.09G237500	Glyma.07G253600	Glyma.07G253500	Glyma.07G201500	Glyma.13G235100	Glyma.13G212400	Glyma.13G175000	Glyma.02G075800	Glyma.06G288800	Glyma.18G098300	Glyma.18G097400	Glyma.16G157800
Growth and development-responsive elements	circadian	CAAAGATATC	0	1	0	0	0	1	0	0	0	0	0	0	1	1	cis-acting regulatory element involved in circadian control
	CCAAT-box	CAACGG	0	0	1	0	0	2	0	1	0	1	0	0	0	0	MYBHv1 binding site; flowering regulation elements
	AT-rich element	ATAGAAATCAA	0	0	1	0	0	0	0	1	0	1	0	0	1	0	binding site of AT-rich DNA binding protein (ATBP-1); flowering regulation elements
	O2-site	GATGATGTGG	0	0	1	0	1	0	1	0	2	1	2	2	1	2	cis-acting regulatory element involved in zein metabolism regulation
	GCN4_motif	TGAGTCA	0	0	1	1	0	1	1	0	0	2	0	1	1	0	cis-regulatory element involved in endosperm expression
	MBSI	aaaAaaC(G/C)GTTA	0	0	0	0	0	0	1	0	0	0	0	0	0	0	MYB binding site involved in flavonoid biosynthetic genes regulation
	MSA-like	TCCAACGGT	0	0	0	2	0	0	0	1	0	0	0	0	0	0	cis-acting element involved in cell cycle regulation
	CAT-box	GCCACT	0	0	0	0	0	0	0	0	0	1	0	1	1	0	cis-acting regulatory element related to meristem expression
	HD-Zip 1	CAAT(A/T)ATTG	0	0	0	0	0	0	0	1	0	0	0	0	0	1	element involved in differentiation of the palisade mesophyll cells
	A-box	CCGTCC	0	0	0	0	0	0	0	1	0	0	0	0	0	0	cis-acting regulatory element
	AAGAA-motif	gGTAAAGAAA	1	0	1	4	4	3	1	2	2	0	1	1	1	1	cis-element involved in secondary xylem development
	as-1	TGACG	1	1	1	4	3	0	1	1	2	0	0	2	2	0	cis-acting regulatory element involved in the root-specific expression
	F-box	CTATTCTCATT	0	0	0	0	0	0	0	0	1	0	0	0	0	0	development related element
Light responsive elements	AT1-motif	AATTATTTTTTATT	2	0	0	0	0	0	0	0	0	0	0	0	0	0	part of a light responsive module
	Box 4	ATTAAT	3	6	3	4	4	3	1	6	3	4	8	0	1	2	part of a conserved DNA module involved in light responsiveness
	I-box	AAGATAAGGCT	1	0	0	0	1	2	1	0	3	0	1	0	0	0	part of a light responsive element
	GA-motif	ATAGATAA	1	0	0	2	0	0	0	0	0	0	0	1	0	0	part of a light responsive element
	G-Box	CACGTT	1	3	2	2	1	3	2	6	6	0	4	2	2	0	cis-acting regulatory element involved in light responsiveness
	TCT-motif	TCTTAC	2	2	0	0	0	2	0	1	2	0	3	2	0	0	part of a light responsive element
	GT1-motif	GGTTAA	0	0	1	0	3	1	0	0	0	0	0	1	1	1	light responsive element
	ATCT-motif	AATCTAATCC	0	0	1	0	0	0	0	0	0	0	0	0	1	0	part of a conserved DNA module involved in light responsiveness
	MRE	AACCTAA	0	0	0	1	0	0	0	1	1	0	0	0	0	0	MYB binding site involved in light responsiveness
	AE-box	AGAAACTT	0	0	1	0	1	0	1	0	0	0	1	0	1	1	part of a module for light response
	TCCC-motif	TCTCCCT	0	1	1	0	0	0	0	1	0	0	0	1	1	0	part of a light responsive element
	chs-CMA2a	TCACTTGA	0	0	0	1	1	0	1	0	1	0	1	0	0	1	part of a light responsive element
	LAMP-element	CTTTATCA	0	0	0	0	0	1	1	0	0	0	0	0	0	0	part of a light responsive element
	Sp1	GGGCGG	0	0	0	0	0	0	0	0	0	0	0	1	0	0	light responsive element
	3-AF1 binding site	TAAGAGAGGAA	0	1	0	0	0	0	0	0	0	0	0	0	0	1	light responsive element
	Box II	ACACGTTGT	0	0	0	0	0	0	1	2	0	0	0	1	0	0	part of a light responsive element
	ATC-motif	AGTAATCT	0	0	0	0	0	1	0	0	0	0	0	0	0	0	part of a conserved DNA module involved in light responsiveness
	GATA-motif	GATAGGG	1	2	0	0	1	0	0	0	0	0	4	0	0	0	part of a light responsive element
Phyhormonal responsive elements	TCA-element	CCATCTTTTT	1	0	0	0	2	0	0	1	3	1	0	0	0	0	cis-acting element involved in salicylic acid responsiveness
	TGACG-motif	TGACG	1	1	1	4	3	0	1	1	2	0	0	2	2	0	cis-acting regulatory element involved in the MeJA-responsiveness
	CGTCA-motif	CGTCA	1	1	1	4	3	0	1	1	2	0	0	2	2	0	cis-acting regulatory element involved in the MeJA-responsiveness
	ABRE	ACGTG	1	3	2	1	1	3	2	4	6	0	3	2	2	0	cis-acting element involved in the abscisic acid responsiveness
	ABRE4	CACGTA	0	1	0	0	1	2	0	2	3	0	2	0	0	0	cis-acting element involved in the abscisic acid responsiveness
	TGA-element	AACGAC	1	0	1	2	1	0	0	0	1	0	0	0	0	0	auxin-responsive element
	P-box	CCTTTTG	0	1	1	0	0	2	0	1	1	0	1	1	1	0	gibberellin-responsive element
	GARE-motif	TCTGTTG	0	0	1	0	1	0	0	0	1	0	0	1	1	1	gibberellin-responsive element
	TATC-box	TATCCCA	0	0	0	0	1	0	0	0	0	0	0	0	0	0	cis-acting element involved in gibberellin-responsiveness
	ERE	ATTTTAAA	1	1	0	2	1	0	3	1	0	0	1	1	0	2	ethylene-responsive element
	ABRE3a	TACGTG	0	1	0	0	1	2	0	2	3	0	2	0	0	0	cis-acting element involved in the abscisic acid responsiveness
Stress-responsive elements	TC-rich repeats	ATTCTCTAAC	1	0	1	0	0	0	0	0	1	1	2	1	0	0	cis-acting element involved in defense and stress responsiveness
	MBS	CAACTG	1	0	1	0	1	1	0	3	1	0	0	1	0	0	MYB binding site involved in drought-inducibility
	AT-rich sequence	TAAAATACT	0	1	0	0	0	0	0	0	0	0	0	0	0	0	element for maximal elicitor-mediated activation (2copies)
	LTR	CCGAAA	0	0	0	0	0	0	0	0	0	0	0	0	0	1	cis-acting element involved in low-temperature responsiveness
	ARE	AAACCA	0	0	3	0	0	3	2	4	2	3	1	3	2	5	cis-acting regulatory element essential for the anaerobic induction
	MYB	CAACCA	2	2	3	1	8	2	2	3	4	1	2	4	4	5	dehydration-responsive elements
	Myb	CAACTG	2	2	5	1	3	2	1	5	2	0	2	3	1	0	dehydration-responsive elements
	MYC	CATGTG	1	3	3	0	5	5	2	3	5	5	6	3	5	4	dehydration-responsive elements
	Myc	TCTCTTA	0	0	1	1	1	3	0	1	2	1	1	0	0	0	dehydration-responsive elements
	Myb-binding site	CAACAG	0	0	1	0	1	0	1	1	1	0	0	3	2	2	dehydration-responsive elements
	STRE	AGGGG	1	1	1	0	0	0	0	1	0	1	2	1	1	1	cis-acting element involved in heat stress
	WRE3	CCACCT	2	2	1	1	0	0	0	0	0	1	0	3	3	0	wounding and pathogen response
	W box	TTGACC	0	1	0	2	0	1	0	0	1	0	0	1	0	1	Fungal elicitor responsive element
	WUN-motif	TTATTACAT	0	1	0	0	1	1	1	1	1	1	3	0	2	0	wound-responsive element
Total CAREs			29	39	42	40	55	47	29	60	65	25	53	48	43	33

## Sheet: Table S6
Table S6. Tissue, age and stress dependent expression profiling of DMP gene family from different transcriptome datasets (Zero value indicates no expression)*.
Gene ID	Root	Root hairs	Nodules	SAM	Leaf	Stem	Flower	Pod	Seed	20 days old leaf	80 days old leaf	7days drought	17days drought	37days drought	Salt stress	Heat stress	72hpi with Fusarium	96hpi with Fusarium	Macrophomina infection in resistant genotype	Macrophomina infection in susceptible genotype	Aphid infestation	SCN infestation	SCN+Aphid infestation
Glyma.02G075800	0.309968	0.531536	0.480077	0.32159	0.0375854	1.67414	0.124478	0.108652	0.0992763	1.19297	11.1156	0.13677	7.42826	10.5352	11.0996	1.6369	10.4368	4.01629	29.9857	5.43499	0	10.3973	4.64925
Glyma.06G288800	0	0	0	0	0	0	0.0570563	0.143631	0	3.89049	7.187	5.90013	8.17173	0	1.02887	16.2035	0.410467	3.81038	4.88557	5.37624	5.88086	7.14249	7.63324
Glyma.07G201500	0.197369	0.0446419	0.358793	0.0249426	0.12989	0.351929	3.78489	0.0415659	0.0227778	2.18883	1.30157	3.63615	23.1382	2.10379	2.51616	31.594	5.7979	8.69663	3.17915	1.23143	2.15094	2.75337	5.08961
Glyma.07G253500	12.8045	16.0545	12.5766	0	0	0	0	0	0	1.4903	6.01656	5.78418	1.37471	8.78098	2.88565	10.6013	2.20056	4.68945	12.9123	0.185325	14.6871	3.18417	13.2888
Glyma.07G253600	2.03573	1.36709	1.07114	0	0	0	0.121251	0	0.0199239	2.62801	8.55557	20.0836	0	25.0325	2.92748	2.753	20.0513	8.45375	0.616273	0	7.54421	0	12.0083
Glyma.09G237500	0.250992	0.594977	0.133119	1.17524	0.0336587	0.16416	0.668824	0.34594	0.313258	0.435927	4.39474	13.2926	9.16423	28.0106	17.8995	7.02556	4.35448	3.02892	3.39383	0	0.520472	15.5284	3.6583
Glyma.13G175000	0.353081	0.189857	0.505454	0.156525	0.16194	0.596063	6.04533	0.121681	0.0556166	0.66873	0.974508	26.6823	1.98998	2.53284	0.387102	17.2287	27.8749	3.78087	19.3517	99.108	2.52361	4.51063	56.6463
Glyma.13G212400	6.36247	2.82012	4.74115	3.64454	3.18064	17.7434	122.328	2.80165	2.23644	1.52266	2.79363	10.3062	4.89719	4.15804	1.08243	5.81707	47.1777	9.91381	19.2176	0.237448	12.6628	1.99357	0
Glyma.13G235100	2.0529	1.08321	2.50123	0.508261	1.26559	5.35259	6.56012	3.56293	1.70832	1.89079	0.861365	0.610479	4.06291	15.3825	1.47077	20.2727	4.00837	1.89615	4.17327	0	8.07521	45.7203	4.32987
Glyma.16G157800	0.59359	0.395682	0.770352	0.0513665	0.0270843	0.156501	0.122024	0.0853646	0.168621	0	0	0.696632	0.539354	2.69823	2.54481	2.67226	8.83025	2.41335	8.16441	9.30472	7.00115	8.92991	3.56081
Glyma.17G020800	0.885695	0.726481	0.478067	1.45195	0.930276	0.442773	0.741203	0.498401	0.84267	0	0	0.457043	2.43386	3.55073	18.0594	2.71872	16.6778	6.50592	0	2.40724	5.45916	3.538	5.21845
Glyma.17G020900	0.323699	0.45873	0	0.346001	2.68746	0.129449	0.148046	0.0477498	0	0	0	3.20347	2.57806	1.75382	2.59888	98.8484	312.506	6.0549	3.2175	0.0433051	6.97351	0.580924	3.90036
Glyma.18G097400	0	0	0	0	0	0	1.23424	0	0	0	0	0	0	0	0	0	124.372	32.7434	0	0	0	0	0
Glyma.18G098300	0	0	0	0	0	0	0.544258	0	0	0	0	0	0	0	0	0	6.2505	5.86361	0	0	0	0	0
*Values represent mean Z-scaled RNA-seq FPKM (Fragments per kilobase of exon per million fragments mapped) from three replicates
SAM-shoot apical meristem, hpi- hours post-inoculation, SCN- soybean cyst nematode.

## Sheet: Table S7
Table S7. List of SgRNAs retrieved for Glyma.18G097400/Glyma.18G098300 targets using web-based tool RGENs (http://www.rgenome.net/).
#RGEN Target (5' to 3')	Position	Cleavage Position (%)	Direction	GC Contents (%, w/o PAM)	Out-of-frame Score	Mismatch 0	Mismatch 1	Mismatch 2
CTCCATATCCTTATCCTTCCCGG	521	81.677	-	45	75.8	2	0	0
TCCATATCCTTATCCTTCCCGGG	520	81.5217	-	45	75.4	2	0	4
CGTTCTTGTATATGGAGGGGAGG	213	33.8509	-	50	72.9	2	0	1
CAAGAAACATCGTGCCCTAATGG	105	18.7888	+	45	72.8	2	0	1
CCATATCCTTATCCTTCCCGGGG	519	81.3665	-	50	70.2	2	0	0
CGATGTTTCTTGGGTTGAGGAGG	94	15.3727	-	50	70	1	2	2
CATTAGGGCACGATGTTTCTTGG	104	16.9255	-	45	69.1	2	0	1
GATGTTTCTTGGGTTGAGGAGGG	93	15.2174	-	45	68.5	1	2	2
TTGGACGCCCTTTGCCATTAGGG	119	19.2547	-	50	67.8	2	0	1
ACATCGTGCCCTAATGGCAAAGG	111	19.7205	+	50	67	2	0	1
CCAATCCCACGTCTGAAAGTAGG	607	95.0311	-	50	66.6	3	3	0
TTTGGACGCCCTTTGCCATTAGG	120	19.4099	-	50	66.5	2	0	1
CATCGTGCCCTAATGGCAAAGGG	112	19.8758	+	50	66.4	2	0	1
GCACGATGTTTCTTGGGTTGAGG	97	15.8385	-	50	65.8	2	1	3
ATTAGGGCACGATGTTTCTTGGG	103	16.7702	-	40	65.3	2	0	3
GGTGTTTCATGTTCGGGTGCTGG	55	9.31677	-	55	64.3	1	1	3
GGACCATCTCAAAAGTGAGGAGG	192	30.5901	-	50	64.2	2	0	0
AACCCTCCTCACTTTTGAGATGG	189	31.8323	+	45	63.9	2	0	0
TAAGGATATGGAGCAAGTGAGGG	531	84.9379	+	40	63.8	2	1	0
GTTGAGGAGGGTTTGAAGAGGGG	81	13.354	-	50	63.2	1	2	13
TCACCAATTGCCTTTTCCCCGGG	503	80.5901	+	50	63.2	2	0	2
CATTGCTATTTCGGATCATAGGG	480	77.0186	+	35	63.1	1	1	2
GGGTTCGGTGTTTCATGTTCGGG	61	10.2484	-	50	62.8	1	3	1
CTTCATCCATGCCGTCATGTCGG	441	70.9627	+	50	62.8	1	0	1
GAACACCATCACCGACATGACGG	452	70.9627	-	50	62.8	1	1	0
GAGGAAGTTACCGAGGAGGGAGG	158	25.3106	-	60	62.2	1	1	1
GGGTTGAGGAGGGTTTGAAGAGG	83	13.6646	-	55	61.9	1	2	12
TGTTTGCAGTAGTTTGTTTCTGG	579	92.3913	+	35	61.8	1	0	2
CCATTGCTATTTCGGATCATAGG	479	76.8634	+	40	61.7	1	1	2
CTTCCCGGGGAAAAGGCAATTGG	506	79.3478	-	55	61.6	2	0	1
CTATCAAAAACCTCCCTCCTCGG	148	25.4658	+	45	60.7	2	0	0
AGAGGGCACAAACCAAGAGGAGG	273	43.1677	-	55	60.7	1	1	3
GGTTGAGGAGGGTTTGAAGAGGG	82	13.5093	-	50	60	1	2	13
GTTCGTGGCCATTGCTATTTCGG	471	75.6211	+	45	60	1	3	0
GTCACCAATTGCCTTTTCCCCGG	502	80.4348	+	50	59.7	2	0	0
CCTTATCCTTCCCGGGGAAAAGG	513	80.4348	-	55	59.7	2	0	0
CGAGGAGGGAGGTTTTTGATAGG	147	23.6025	-	50	59.4	2	0	0
AGGTTTTTGATAGGGTTTTTTGG	138	22.205	-	30	59.3	2	0	0
GGAGGACCATCTCAAAAGTGAGG	195	31.0559	-	50	59.3	2	0	0
ATAAGGATATGGAGCAAGTGAGG	530	84.7826	+	40	59.2	2	1	0
TGGGGAGGAAGTTACCGAGGAGG	162	25.9317	-	60	59	1	1	0
TGGCCGTTCTTGTATATGGAGGG	217	34.472	-	45	58.9	2	0	0
GGGGAGGAAGTTACCGAGGAGGG	161	25.7764	-	60	57.9	1	1	1
CCTATGATCCGAAATAGCAATGG	479	75.1553	-	40	57.9	1	1	2
GGGGTTCGGTGTTTCATGTTCGG	62	10.4037	-	50	57.6	1	4	0
GAGGAGGGAGGTTTTTGATAGGG	146	23.4472	-	45	57.3	2	0	0
CGCCGTCTTCAAGCCCGCTGTGG	378	61.1801	+	70	57.3	1	1	0
GAGAGTTTCCCTTTGATGGTGGG	553	88.354	+	45	57	2	2	2
CTGGCCGTTCTTGTATATGGAGG	218	34.6273	-	50	56.7	2	0	0
CAAGCCCGCTGTGGCCGTCCCGG	387	62.5776	+	75	56.6	1	1	0
AAACAATCCCCACCATCAAAGGG	561	87.8882	-	40	56.5	2	2	2
GCACTGGCCGTTCTTGTATATGG	221	35.0932	-	50	56.4	2	0	0
CCTTTTCCCCGGGAAGGATAAGG	513	82.1429	+	55	56.3	2	0	0
GGAGGGTTTGAAGAGGGGTTCGG	76	12.5776	-	55	56.1	1	0	0
GACCATCTCAAAAGTGAGGAGGG	191	30.4348	-	45	55.8	2	0	1
AGAGTTTCCCTTTGATGGTGGGG	554	88.5093	+	45	55.8	2	0	3
CTCGGTAACTTCCTCCCCACAGG	166	28.2609	+	60	55.1	1	1	0
TGAGGAGGGTTCCTGTGGGGAGG	177	28.2609	-	65	55.1	2	0	0
CTCCCCTCCATATACAAGAACGG	214	35.7143	+	45	55	2	1	0
CCCCGGGAAGGATAAGGATATGG	519	83.0745	+	55	55	2	0	0
TTGAAGACGGCGAGGCCCCTCGG	367	57.764	-	65	54.8	2	0	0
CAAACAATCCCCACCATCAAAGG	562	88.0435	-	45	54.5	2	0	0
GGGTGTGAATGTGGGTGCACTGG	237	37.5776	-	60	54.3	1	1	0
CTGTGGGGAGGAAGTTACCGAGG	165	26.3975	-	60	54.1	1	1	0
AGGAGAGGGCACAAACCAAGAGG	276	43.6335	-	55	54	1	1	2
GAGGAGGAAGTGGATCATGAGGG	257	40.6832	-	50	53.9	3	1	0
GGCCGTTCTTGTATATGGAGGGG	216	34.3168	-	50	53.8	2	0	0
GTCTTCCGGGACGGCCACAGCGG	392	61.646	-	70	53.8	1	1	0
ACTATGGCTTCGTCACCCCGAGG	350	56.8323	+	60	53.7	2	0	0
GAGGGAGAGTTTCCCTTTGATGG	549	87.7329	+	50	53.6	2	2	3
GGAGAGTTTCCCTTTGATGGTGG	552	88.1988	+	50	53.4	2	0	0
AAAAGTGAGGAGGGTTCCTGTGG	182	29.0373	-	50	53.1	2	0	0
AGTGGAAGAAGAAGCAGGAGAGG	291	45.9627	-	50	53.1	4	0	4
GAAGACGGCGAGGCCCCTCGGGG	365	57.4534	-	75	53	2	0	0
CCATCACCGACATGACGGCATGG	447	70.1863	-	60	53	1	1	1
GGCCACAGCGGGCTTGAAGACGG	380	59.7826	-	65	52.8	1	1	0
GATCATGAGGGTGTGAATGTGGG	245	38.8199	-	45	52.6	1	1	0
TGAAGACGGCGAGGCCCCTCGGG	366	57.6087	-	70	52	2	0	0
CAGCGGGCTTGAAGACGGCGAGG	375	59.0062	-	70	51.9	1	1	0
AGAGGAGGAAGTGGATCATGAGG	258	40.8385	-	50	51.8	3	1	1
CAATTGCCTTTTCCCCGGGAAGG	507	81.2112	+	55	50.9	2	0	0
GGATCATGAGGGTGTGAATGTGG	246	38.9752	-	50	50.7	1	1	1
TGGCCGTCCCGGAAGACGACAGG	398	64.2857	+	70	50.7	2	0	0
AAGACGACAGGTTTAAGGTCGGG	410	66.1491	+	45	50.6	2	0	0
CCCGGAAGACGACAGGTTTAAGG	405	65.3727	+	55	50.5	2	0	0
TCTTCCGGGACGGCCACAGCGGG	391	61.4907	-	70	50.3	1	1	0
AAAGTGAGGAGGGTTCCTGTGGG	181	28.882	-	50	50.1	2	0	0
